# Supplementary material for: Conducting collagen-polypyrrole hybrid aerogels made from animal skin waste
Source: Royal Society of Chemistry journal article supplement (doi:10.1039/c6ra08876g), 2016-01-01
Supplement: c6ra08876g1.pdf [file c6ra08876g1.pdf]

## Electronic Supplementary Information

### Conducting collagen-polypyrrole hybrid aerogels made from animal skin wastes

**Berhanu Telay Mekonnen<sup>a,b</sup>, Murali Ragothaman<sup>a</sup>, Cheirmadurai Kalirajan<sup>a</sup>, Thanikaivelan Palanisamy<sup>a,b\*</sup>**

*<sup>a</sup>Advanced Materials Laboratory, Central Leather Research Institute (Council of Scientific and Industrial Research), Chennai, India.*

*<sup>b</sup>Academy of Scientific and Innovative Research, Anusandhan Bhawan, New Delhi, India.*

**Table S1.** Conductivity of the 100/100 wt.% C/PPy aerogels with different oxidants and dopants.

| <b>S.No</b> | <b>Oxidant</b>    | <b>Dopant</b> | <b>Conductivity<br/>(S<sub>cm</sub><sup>-1</sup>)</b> |
|-------------|-------------------|---------------|-------------------------------------------------------|
| 1           | FeCl <sub>3</sub> | AQSA-Na       | $3.59 \times 10^{-4}$                                 |
| 2           | FeCl <sub>3</sub> | pTSA          | $1.34 \times 10^{-4}$                                 |
| 3           | FeCl <sub>3</sub> | DBSA          | $3.67 \times 10^{-5}$                                 |
| 4           | CuCl <sub>2</sub> | AQSA-Na       | $2.35 \times 10^{-5}$                                 |
| 5           | CuCl <sub>2</sub> | pTSA          | $3.93 \times 10^{-6}$                                 |
| 6           | CuCl <sub>2</sub> | DBSA          | $8.62 \times 10^{-7}$                                 |

**Table S2.** Elemental compositions of C/PPy aerogels analyzed using the CHNS technique.

| <b>Sample</b>      | <b>% C</b> | <b>% H</b> | <b>% N</b> | <b>% S</b> |
|--------------------|------------|------------|------------|------------|
| 100/0 wt.% C/PPy   | 42.7 ± 1.6 | 6.5 ± 0.7  | 15.5 ± 0.7 | 0.6 ± 0.1  |
| 100/25 wt.% C/PPy  | 50.7 ± 0.4 | 5.7 ± 0.1  | 13.3 ± 1.2 | 5.5 ± 0.7  |
| 100/50 wt.% C/PPy  | 52.1 ± 1.3 | 5.1 ± 0.3  | 12.2 ± 0.4 | 5.9 ± 1.6  |
| 100/75 wt.% C/PPy  | 53.2 ± 2.3 | 5.0 ± 0.1  | 11.4 ± 2.0 | 6.1 ± 0.1  |
| 100/100 wt.% C/PPy | 54.9 ± 0.8 | 4.1 ± 0.5  | 10.4 ± 0.4 | 6.3 ± 0.2  |
| 0/100 wt.% C/PPy   | 59.5 ± 1.0 | 3.1 ± 0.1  | 9.1 ± 0.1  | 7.4 ± 0.6  |

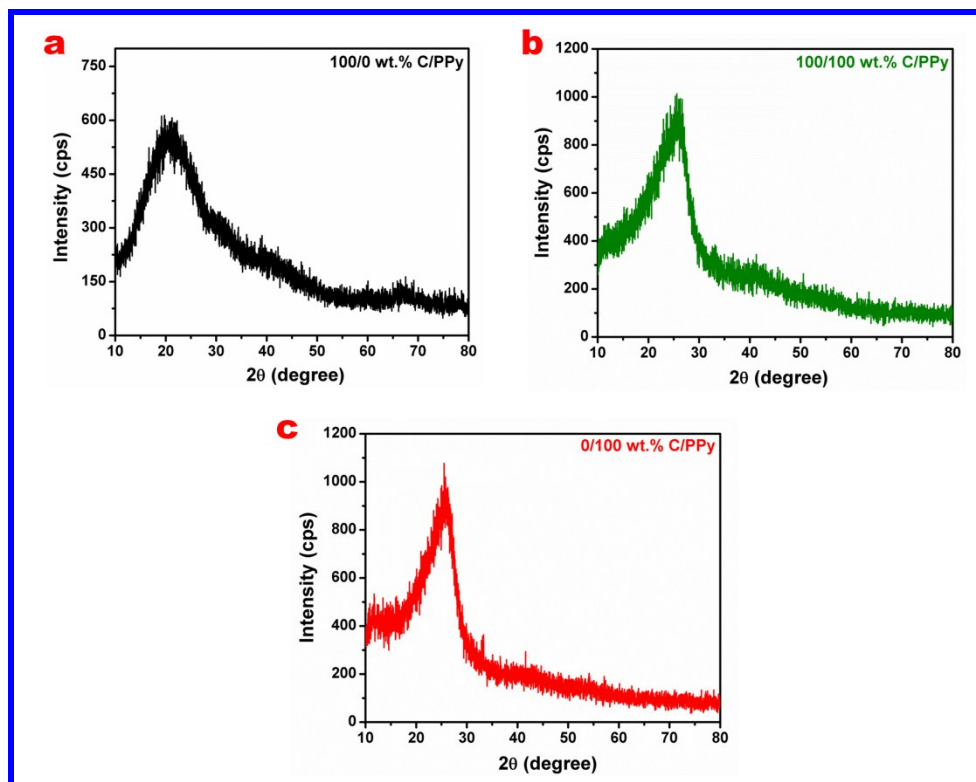

**Fig. S1.** XRD patterns of (a) 100/0, (b) 100/100 and (c) 0/100 wt.% C/PPy aerogels.

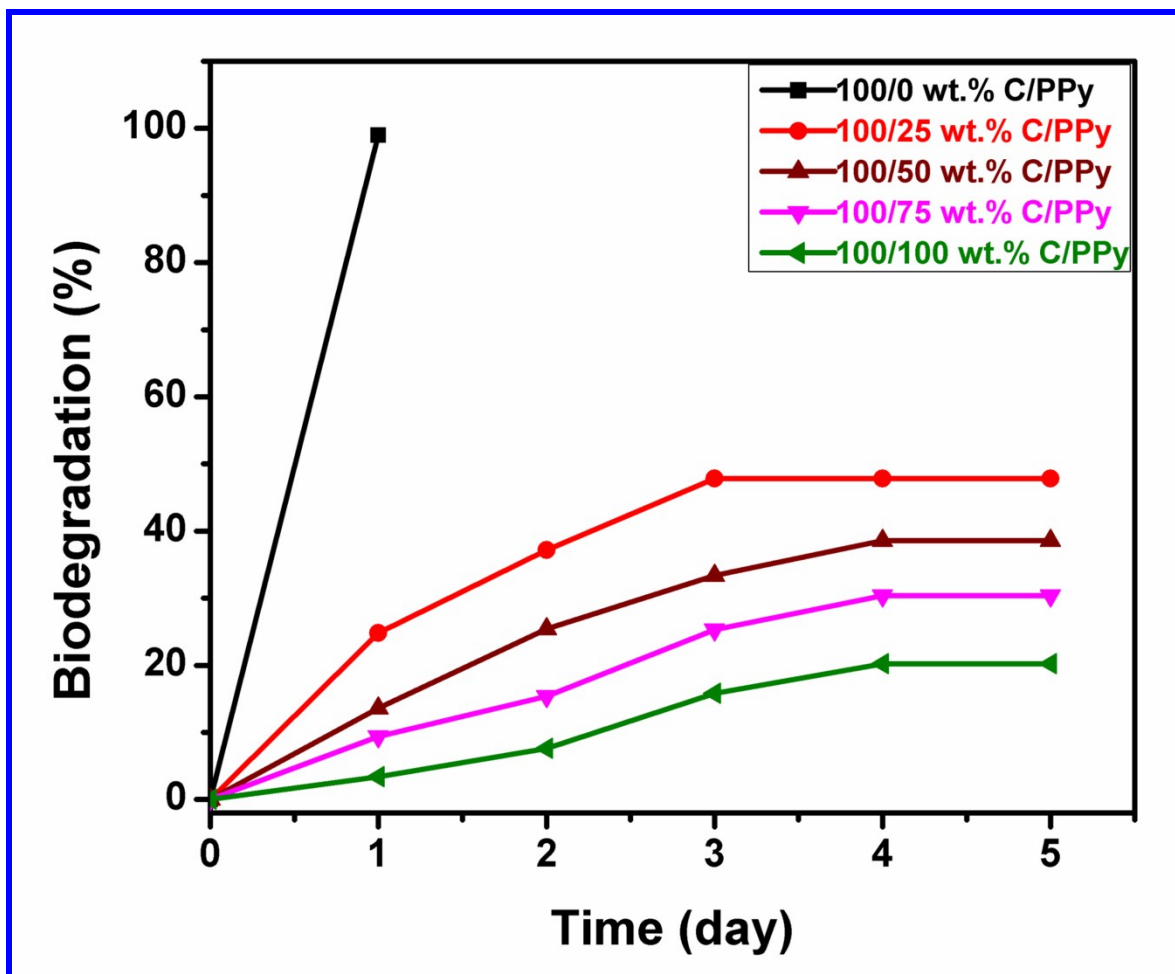

**Fig. S2.** *In vitro* biodegradation patterns of 100/0, 100/25, 100/50, 100/75 and 100/100 wt.% C/PPy aerogels.
